# Supplementary material for: Preparation, photoluminescence and excited state properties of the homoleptic cluster cation [(W6I8)(CH3CN)6]4+
Source: Royal Society of Chemistry journal article supplement (doi:10.1039/d2dt04063h), 2023-01-01
Supplement: d2dt04063h1.pdf [file d2dt04063h1.pdf]

## Supporting Information for:

### Preparation and Luminescence of the Homoleptic Cluster Cation

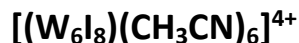

**Florian Pachel,<sup>a</sup> Philipp Frech,<sup>b</sup> Markus Ströbele,<sup>a</sup> David Enseling,<sup>c</sup> Carl P. Romao,<sup>d</sup> Thomas Jüstel,<sup>c</sup> Marcus Scheele<sup>b</sup> and Hans-Jürgen Meyer<sup>a\*</sup>**

<sup>a</sup> Section for Solid State and Theoretical Inorganic Chemistry, Institute of Inorganic Chemistry, University of Tübingen, Auf der Morgenstelle 18, 72076 Tübingen, Germany.

<sup>b</sup> Institute of Physical and Theoretical Chemistry, University of Tübingen, Auf der Morgenstelle 18, 72076 Tübingen, Germany.

<sup>c</sup> Department of Chemical Engineering, Münster University of Applied Science, Stegerwaldstraße 39, 48565 Steinfurt, Germany.

<sup>d</sup> Department of Materials, ETH Zurich, Wolfgang-Pauli-Straße 27, 8093 Zurich, Switzerland.

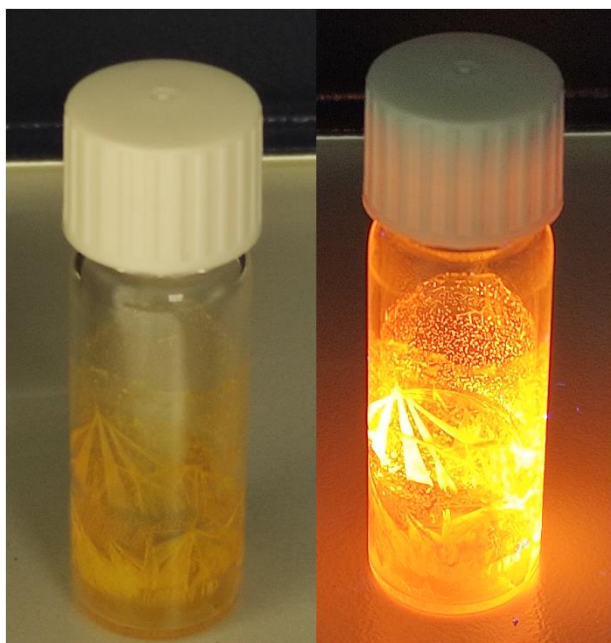

Figure S1. Crystals of III under VIS (left side) and UV (right side) irradiation

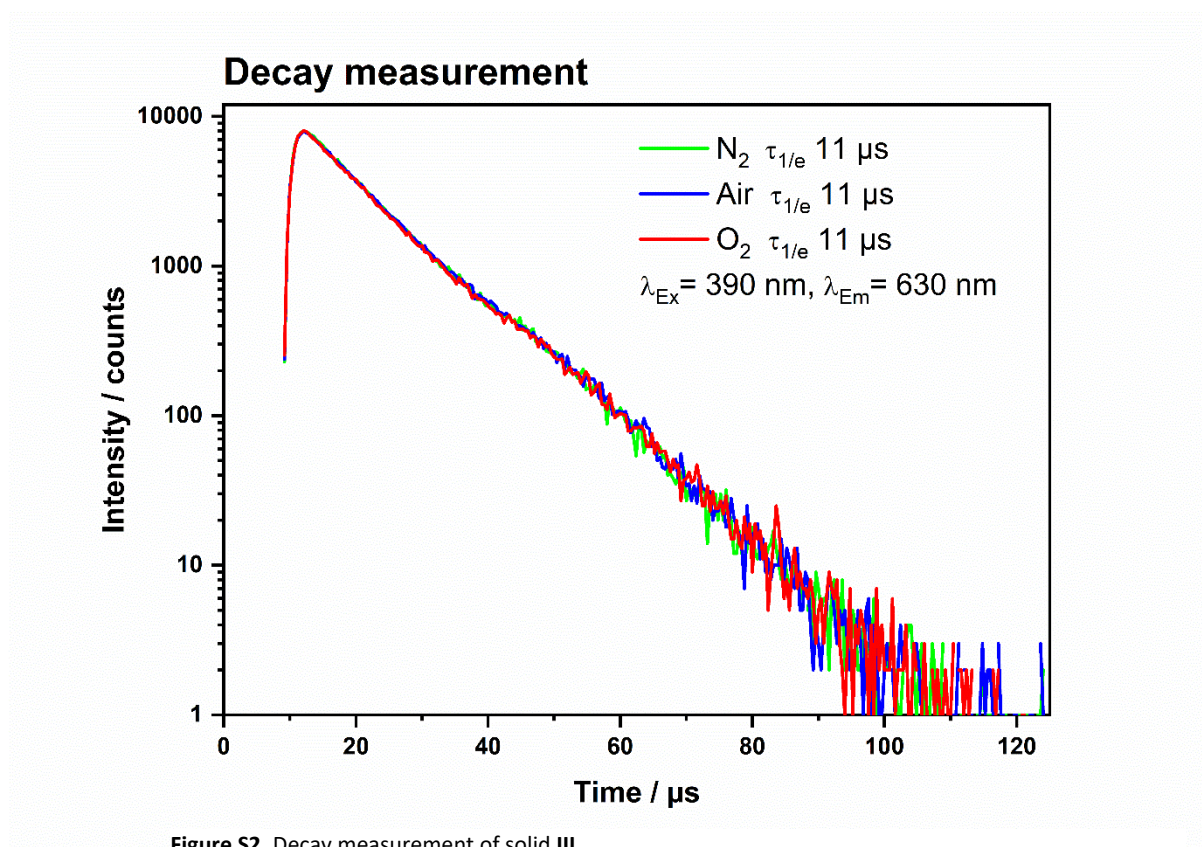

Figure S2. Decay measurement of solid III.

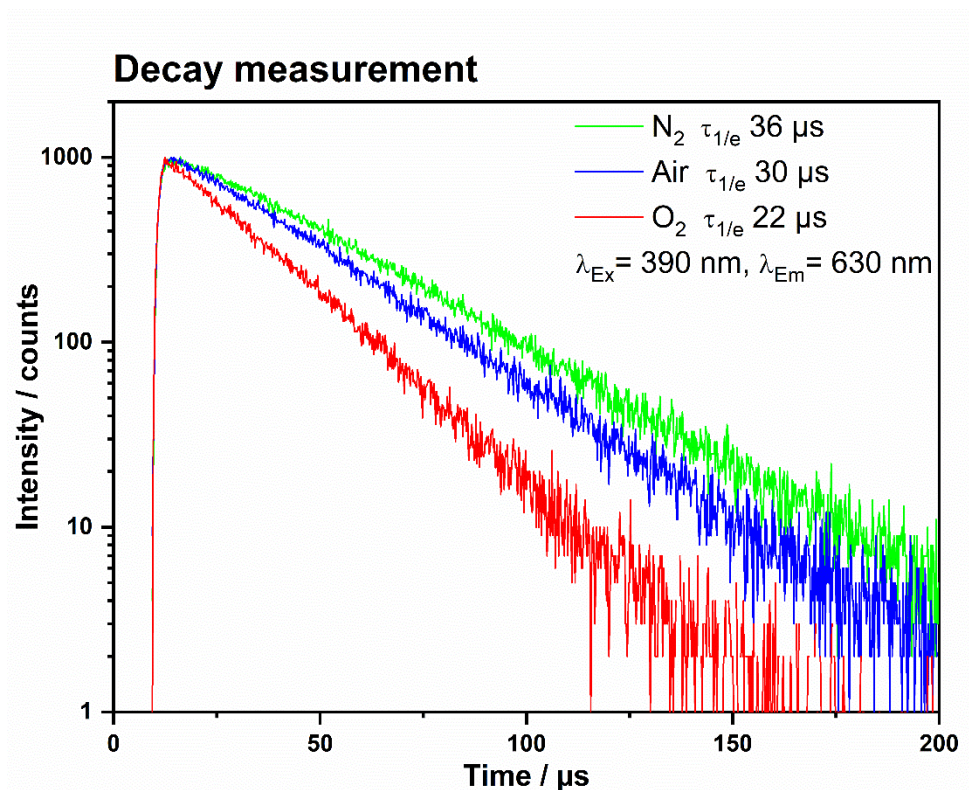

Figure S3. Decay measurement of solid  $(\text{TBA})_2[\text{W}_6\text{I}_8(\text{CO}_2\text{C}_3\text{F}_7)_6]$ .

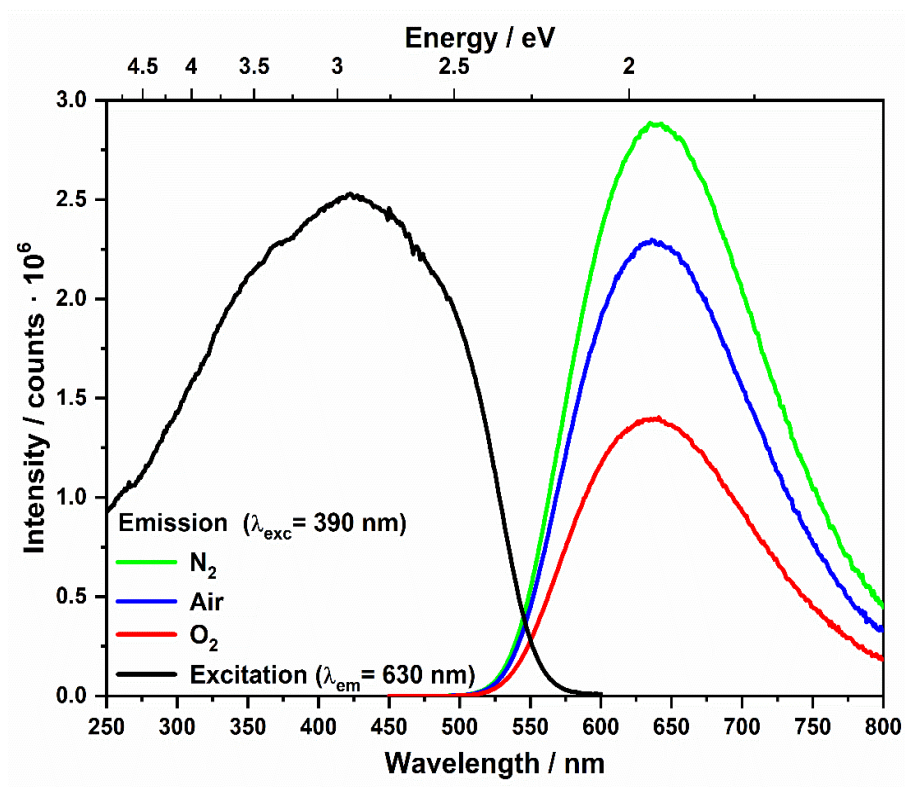

Figure S4. Excitation and emission spectra of solid  $(\text{TBA})_2[\text{W}_6\text{I}_8(\text{CO}_2\text{C}_3\text{F}_7)_6]$  under nitrogen, air and oxygen atmosphere.

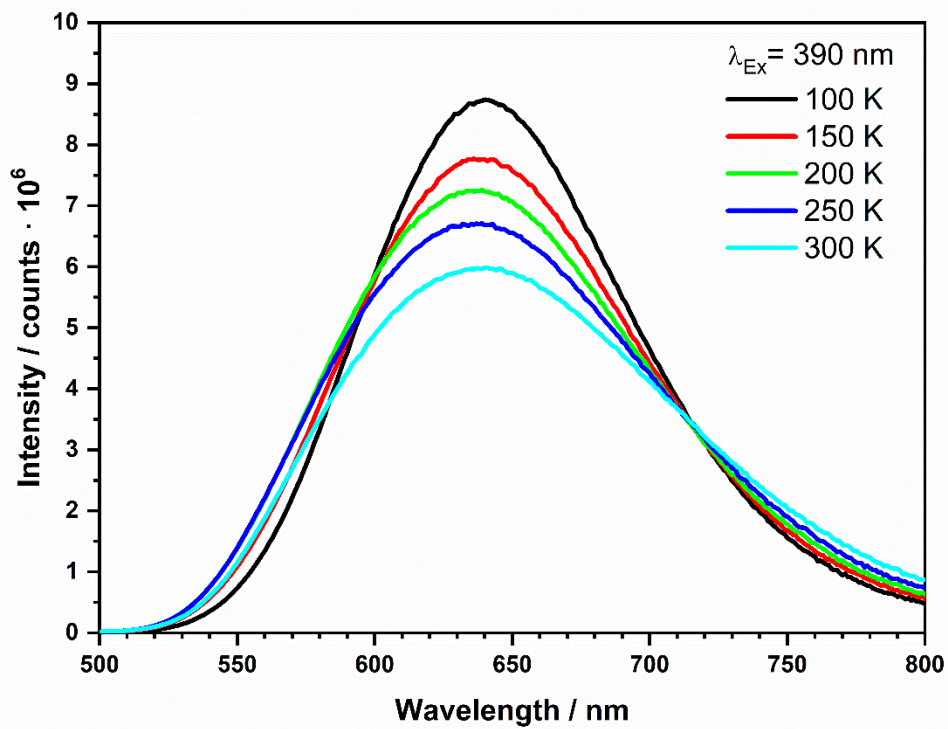

Figure S6. Emission spectra of solid  $(\text{TBA})_2[\text{W}_6\text{I}_8(\text{CO}_2\text{C}_3\text{F}_7)_6]$  at different temperatures.

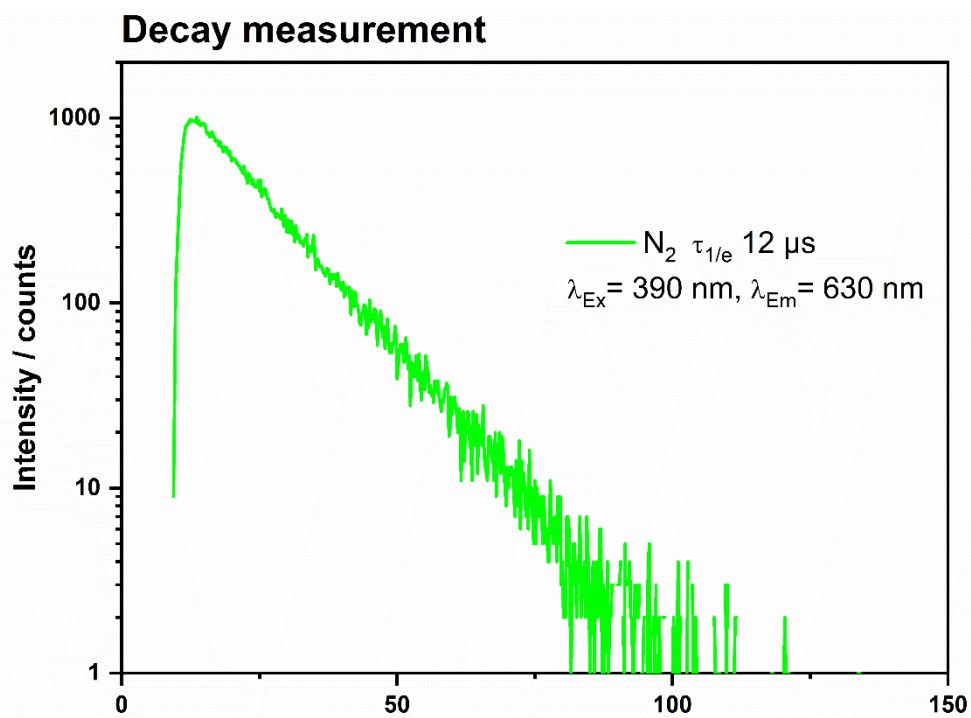

Figure S5. Decay measurement of III in acetonitrile.

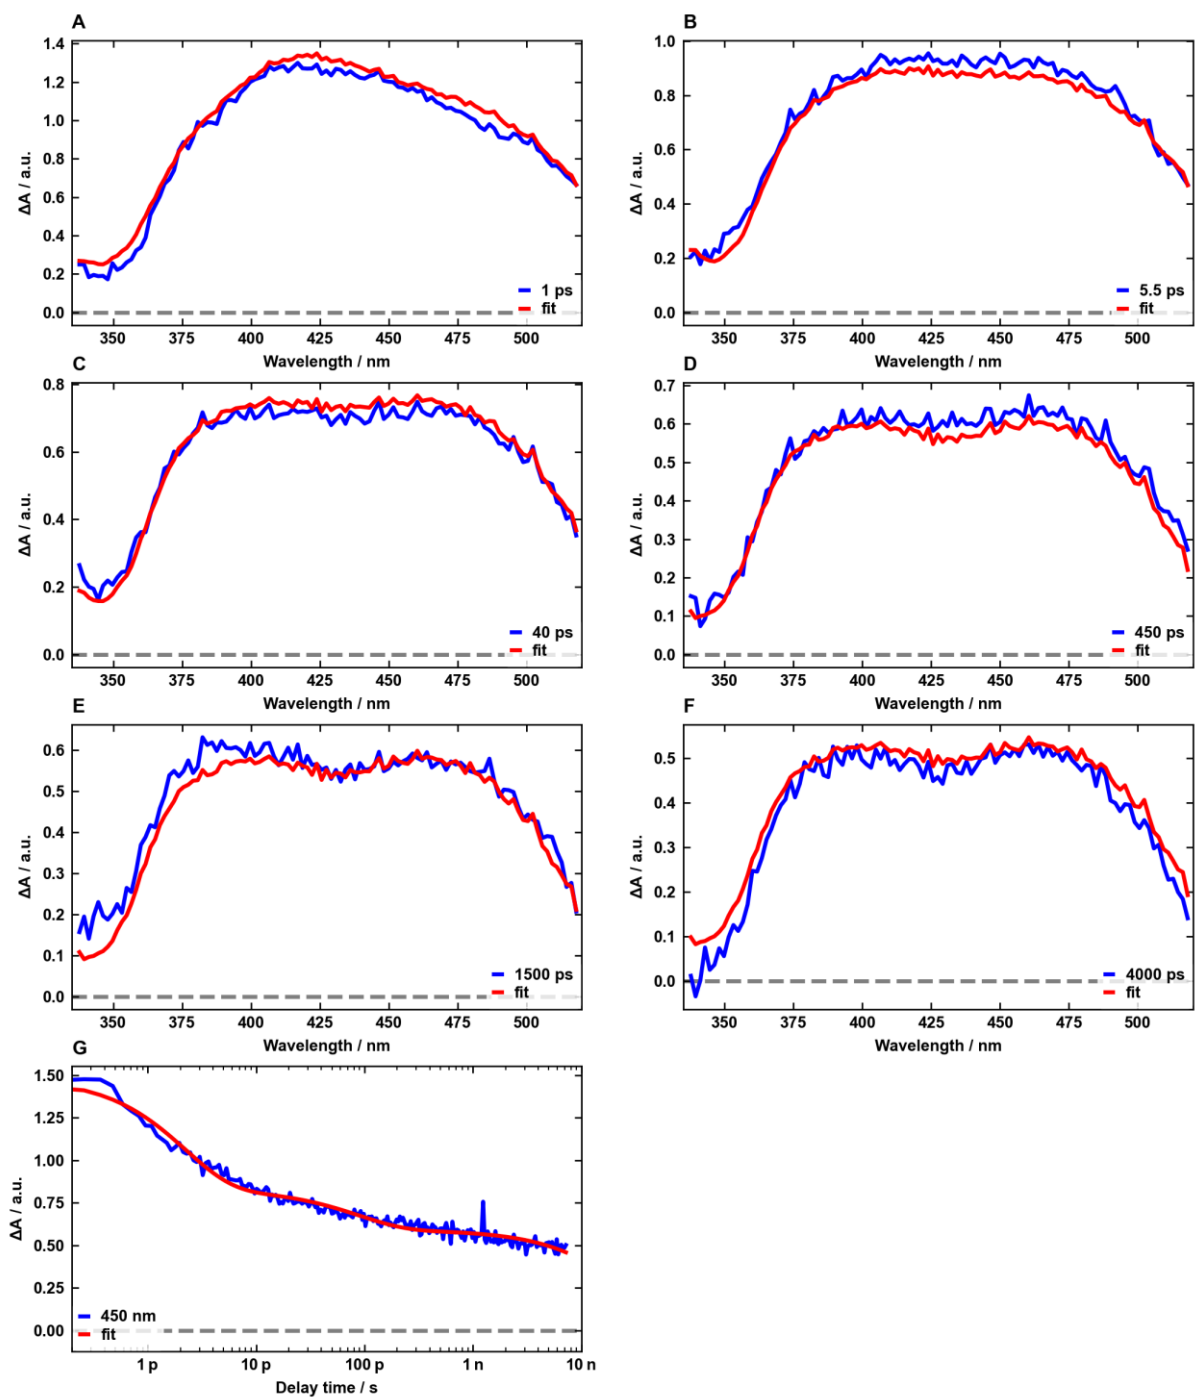

**Figure S7.** Selected  $\Delta A$  spectra (A-F) of III at different time delays (blue) after excitation at 300 nm and kinetic trace at 450 nm (G). The corresponding fit spectra and traces of the global analysis are shown in red.

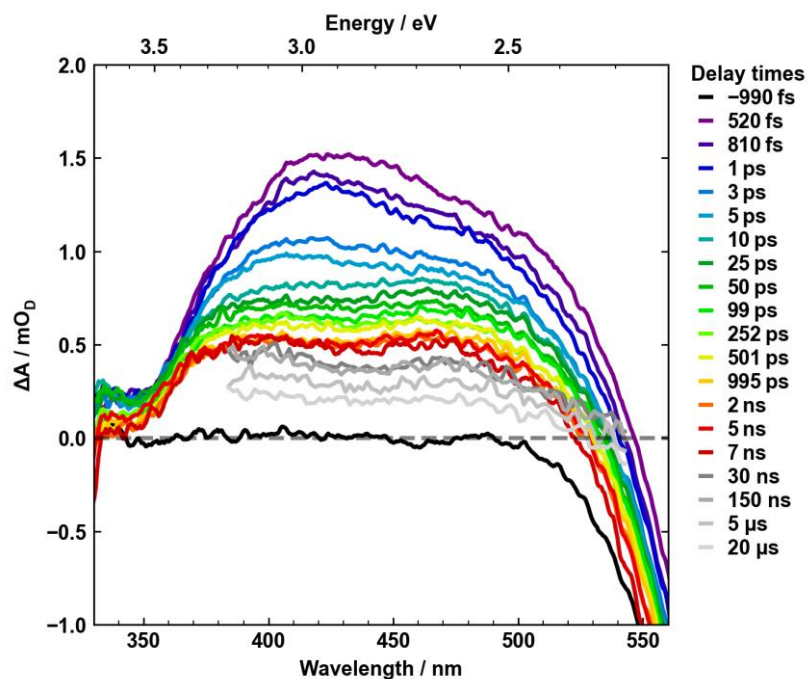

**Figure S8.** Selected  $\Delta A$  spectra of **III** at different delay times after excitation at 300 nm. A femtosecond transient absorption spectrometer was used for delay times up to 7.5 ns. For the long-lived species longer than 7 ns, a different nanosecond pump probe spectrometer was used (grey scale). The negative signals at wavelengths higher than 520 nm are due to strong luminescence.

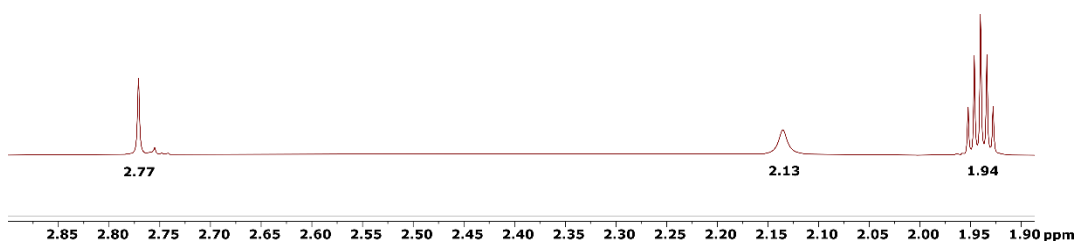

**Figure S9.** Section of the  $^1\text{H-NMR}$  of **III** in  $\text{CD}_3\text{CN}$  showing the signal for the  $\text{CH}_3$ -group at 2.77 ppm and a signal of  $\text{H}_2\text{O}$  at 2.13 ppm.

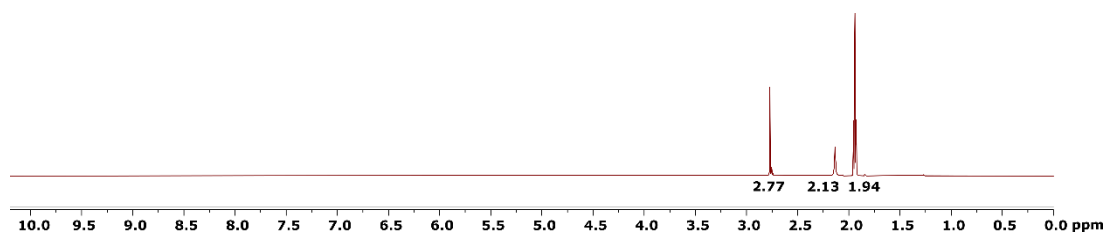

**Figure 10.** Greater section of the  $^1\text{H-NMR}$  of **III** in  $\text{CD}_3\text{CN}$  between 0.0 and 10 ppm.

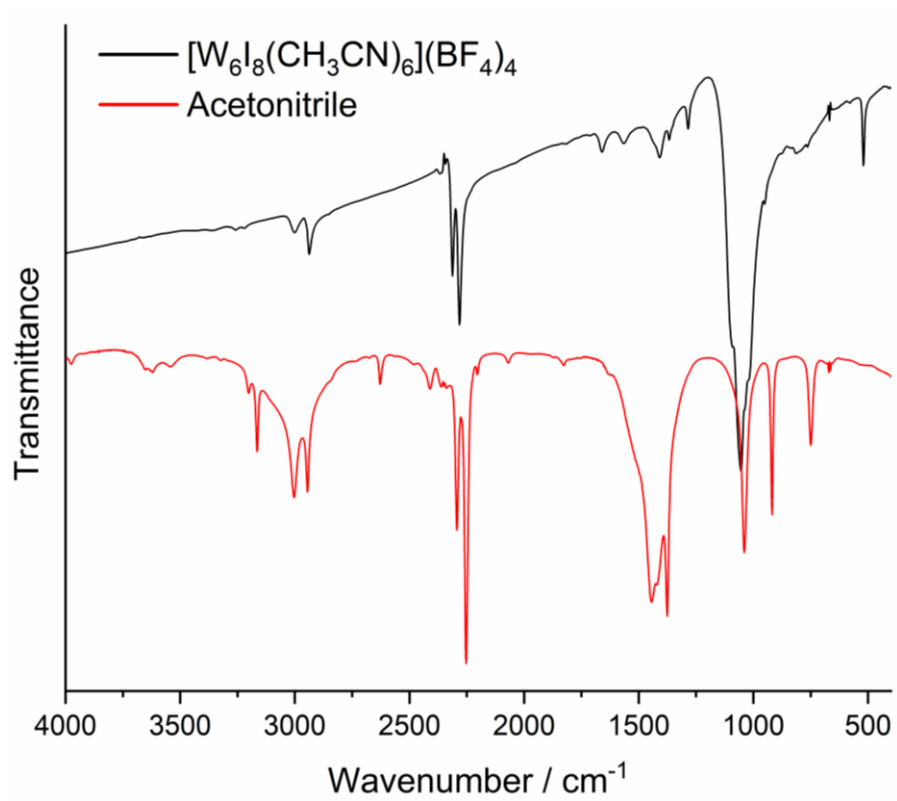

**Figure 11.** Infrared spectrum of **III** in black and of acetonitrile in red.
